**Running Head:** Psychological factors and disability

**Title:** Association between psychological factors related to pain and instrumental activities of daily living disability in older adults with knee osteoarthritis

**Author names:** Keigo Nanjo, P.T, M.S.<sup>a, b, \*</sup>; Takashi Ikeda, P.T, Ph.D.<sup>a, c, d,</sup>; Naoko Nagashio, P.T., B.S.<sup>b</sup>; Tomoko Sakai, M.D., Ph.D.<sup>a</sup>; and Tetsuya Jinno, M.D., Ph.D.<sup>e</sup>

# **Affiliations**

<sup>a</sup> *Department of Rehabilitation Medicine, Tokyo Medical and Dental University Graduate School, Tokyo, Japan*

<sup>b</sup> *Department of Rehabilitation, Shonan Kamakura General Hospital, Kanagawa, Japan*

<sup>c</sup> *School of Nursing and Rehabilitation Sciences, Showa University, Kanagawa, Japan*

<sup>d</sup> *Research Institute for Sport and Exercise Sciences, Showa University, Kanagawa, Japan*

<sup>e</sup> *Department of Orthopaedic Surgery, Dokkyo Medical University Saitama Medical Center, Saitama, Japan*

**Acknowledgements:** The authors thank PTs. D. Kurihara, K. Imahira and K. Suda for their cooperation with data collection.

**Declaration of Interest:** The authors report no conflicts of interest.

**Funding:** This research did not receive any specific grant from funding agencies in the public, commercial, or not-for-profit sectors.

**Device Status Statement:** The manuscript submitted does not contain information about medical device.

**Data availability statement:** The data that support the findings of this study are available from the corresponding author, Nanjo, K., upon reasonable request.

**\*Corresponding author:**

Keigo Nanjo, P.T., M.S.

Tokyo Medical and Dental University Graduate School, Department of Rehabilitation Medicine

1-5-24, Yusima, Bunkyo-ku, Tokyo 113-8510, Japan

E-mail: [nanjo.reh@tmd.ac.jp](mailto:nanjo.reh@tmd.ac.jp)

Tel: +81-03-5803-5648

## Abstract

**Objective:** To investigate the association between psychological factors related to pain and instrumental activities of daily living (IADL) disability in older adults with knee osteoarthritis (OA).

**Design:** A cross-sectional study.

**Setting:** Outpatients at a general hospital in Japan.

**Participants:** One hundred seventy-nine (N=179) patients with knee OA and aged  $\geq 65$  years.

**Interventions:** Not applicable.

**Main Outcome Measure:** Six-item short form of the pain catastrophizing scale (PCS-6) and four-item short form of the pain self-efficacy questionnaire (PSEQ-4) were used to assess the psychological status related to pain. IADL status was assessed using eight activity items. Participants selected “able,” “need help,” or “unable” depending on their abilities to perform these IADL activities. If they chose “need help” or “unable” to perform, for at least one item, we defined them as “disabled.”

**Results:** Of all participants, 88 (49.1%) showed disability in conducting IADL. Binary logistic regression analysis with the dependent variable as IADL disabled or not and PCS-6 and PSEQ-4 as independent variables were performed. Age, sex, pain intensity, depressive symptoms, usual gait speed (UGS), and isometric knee extension strength were included as covariates in the logistic regression model. Only PSEQ-4 (odds ratio [OR]=0.90, 95% confidence interval [95%CI]=0.82–0.99,  $p=0.02$ ) was a significant independent variable for psychological factors related to pain. PCS-6 was not a significant variable (OR=1.06, 95%CI=0.94–1.19,  $p=0.13$ ). Sex (OR=0.38, 95%CI=0.15–0.96,  $p=0.04$ ) and UGS (OR=0.13, 95%CI=0.02–0.72,  $p=0.02$ ) were significantly independent variables.

**Conclusion:** Our study showed the importance of assessing self-efficacy related to pain using the PSEQ-4 to determine the presence of IADL disability in older adults with knee OA.

**Keywords:** activities of daily living, gait speed, knee, osteoarthritis, pain, self-efficacy

1    **Abbreviations:** BADL, basic activities of daily living; CCI, Charlson comorbidity  
2    index; CI, confidence interval; GDS-15, fifteen-item geriatric depression scale ; IADL,  
3    instrumental activities of daily living; IKES, isometric knee extension strength; KL-  
4    score, Kellgen-Lawllence score; KOOS-pain, pain subscale of the knee injury and  
5    osteoarthritis outcome score; OA, osteoarthritis; OR, odds ratio; PCS-6, six-item short  
6    form of the pain catastrophizing scale; PSEQ-4, four-item short form of the pain self-  
7    efficacy questionnaire; ROM, range of motion; TKA, total knee arthroplasty; UGS,  
8    usual gait speed; UKA, unicompartmental knee arthroplasty  
9

Knee osteoarthritis (OA) is a prevalent chronic condition related to aging, and one of the common causes of disabilities limiting daily activities among the elderly.<sup>1</sup> Since the population of older adults with knee OA-related disabilities is increasing globally,<sup>2</sup> health care professionals need effective countermeasures to address this concern.

Instrumental activities of daily living (IADL) are essential elements of the independent lives of older adults. It is marked as independent functioning in a given environment and includes activities such as meal preparation, shopping, commutation, financial management, and performance of other household chores.<sup>3</sup> Since IADL disability in older adults influences health-related quality of life,<sup>4</sup> all-cause mortality,<sup>5</sup> and decline of cognitive function,<sup>6</sup> assessments and interventions for IADL disability are important in older adults.

Disabilities in the daily lives of patients with knee OA are affected by several factors such as gait speed, knee muscle strength, and pain.<sup>7,8</sup> Pain-related psychological factors such as pain catastrophizing and self-efficacy<sup>10,11,12</sup> have also been reported in

disabled patients with knee OA. Regarding psychological interventions for patients with knee OA, a systematic review showed effectiveness in improving functional limitation.<sup>13</sup> A randomized controlled trial showed that a combined intervention of exercise and cognitive therapy for pain was more effective in dealing with the disability than exercise or cognitive therapy each alone.<sup>14</sup>

In most studies regarding psychological factors related to pain among patients with knee OA,<sup>9-12,14</sup> disability was treated as a concept that combines basic activities of daily living (BADL) and IADL. It is well known that disabilities in older adults progress hierarchically,<sup>15</sup> IADL disability occurs before BADL disability.<sup>16</sup> To prevent an incident or deterioration of disabilities in older adults with knee OA, countermeasures should be taken at an early stage of the disability such as IADL disability. Therefore, identifying specific factors related to IADL disability is needed to develop effective interventions for treating it. To our knowledge, there are few studies on IADL disability in older adults with knee OA.<sup>17,18</sup> Psychological interventions focused on pain management are recommended for disabilities in older adults with knee

OA;<sup>13</sup> however, the association between psychological factors related to pain and IADL disability is unclear.

The aim of this study was to investigate the association between psychological factors related to pain and IADL disability in older adults with knee OA. We hypothesized that psychological factors such as pain catastrophizing and pain-related self-efficacy were independently associated with IADL disability in older adults with knee OA, even when adjusted for covariates.

## Methods

### *Participants*

Patients with either knee OA scheduled for unilateral total knee arthroplasty (TKA) or unicompartmental knee arthroplasty (UKA) were eligible for this study. The inclusion



criteria were age  $\geq 65$  years and diagnosis of bilateral knee OA based on the clinical guidelines: knee pain for  $>3$  months and Kellgren–Lawrence score (KL-score) of  $\geq 2$ .<sup>19</sup> Conversely, the exclusion criteria were: rheumatoid arthritis; knee OA after trauma; dementia (mini-mental state examination score  $<23$ ); inability to walk with a cane by oneself; history of surgery on the lower extremity; a plan for TKA or UKA on the other side; serious pathologies (e.g., cancer during treatment) and neurological findings (e.g., muscle weakness) that could influence the test performance. A total of 357 patients were identified at the start of the study. Of these, 166 patients were excluded due to a history of TKA or UKA on the other side ( $n=106$ ), history of lower extremity surgery except knee joint ( $n=32$ ), rheumatoid arthritis ( $n=13$ ), mini-mental state examination score  $<23$  ( $n=3$ ), knee OA after trauma ( $n=3$ ), and inability to walk by themselves with a cane ( $n=9$ ). A total of 191 patients were invited to participate in this study; 12 refused to participate. A total of 179 patients were included in the study.

## ***Study design***

This study used a cross-sectional design. The conducting and reporting of this study were guided by the STROBE guidelines.<sup>20</sup> Recruitment was conducted at Shonan Kamakura General Hospital from May 17, 2019, to May 30, 2021. All participants provided informed consent before the study began. The study was conducted in accordance with the Declaration of Helsinki and was approved by the research ethics boards of the Tokushukai Group Ethics Committee (No. TGE01198-024). All measurements were evaluated by physical therapists one month before the surgery. Age, sex, body mass index, Charlson comorbidity index<sup>21</sup>, and KL-score<sup>22</sup> of both knees were obtained as confounders from clinical records.

## ***Outcome measures***

### ***IADL status***

IADL status was assessed on the basis of eight activity items (food preparation, shopping, housekeeping, doing laundry, taking medication, using transportation, using a telephone, and handling finances) using the IADL scale proposed by Lawton and Brody.<sup>3</sup> Participants were asked to answer their abilities to perform these IADL

activities as “able,” “need help,” or “unable.” Based on previous cross-sectional reports,<sup>23,24</sup> we defined those participants as “disabled” who opted for “need help” or “unable” to perform for at least one item; otherwise, they were defined as “non-disabled.”

#### *Pain status*

Pain catastrophizing and self-efficacy were assessed as psychological factors related to pain. Pain catastrophizing was assessed using Japanese version of six-item short form of the pain catastrophizing scale (PCS-6).<sup>25</sup> Pain catastrophizing scale consists of subscales related magnification, rumination, and helplessness.<sup>26</sup> It is reported that PCS-6 has the same property as the original version, correlates to pain intensity assessed by numerical rating scales ( $r=0.30$ ,  $p<0.001$ ),<sup>27</sup> and has good internal consistency (Cronbach’s  $\alpha=0.90$ ).<sup>25</sup> Participants were questioned the degree to which they experienced each of 6 thoughts and feelings when experiencing pain, on a scale from 0 (“not at all”) to 4 (“all the time”). The total PCS-6 score ranges from 0 to 24, with higher scores indicating higher levels of pain catastrophizing.

1  
2 Self-efficacy was assessed using Japanese version of four-item short form of  
3 the pain self-efficacy questionnaire (PSEQ-4).<sup>28</sup> The pain self-efficacy questionnaire is a  
4 10-item self-report questionnaire used to assess self-efficacy in individuals with chronic  
5 pain.<sup>29</sup> It is reported that PSEQ-4 has the same property as the original version,<sup>27</sup>  
6 correlates pain intensity assessed by numerical rating scales ( $r=-0.35$ ,  $p<0.001$ ), and has  
7 good internal consistency (Cronbach's  $\alpha=0.90$ ).<sup>28</sup> The PSEQ-4 consists of four  
8 questions, and participants were questioned how confident they were on a scale of 0  
9 ("not at all confident") to 6 ("completely confident") to perform the given activities  
10 despite pain. The PSEQ-4 scores range from 0 to 24, with higher scores indicating more  
11 confidence in performing the given activities despite pain.

12  
13 The Japanese version of pain subscale of the knee injury and osteoarthritis  
14 outcome score (KOOS-pain) was used for the representative index of pain intensity.<sup>30</sup>  
15 KOOS-pain consists of nine questions. Participants were questioned about their  
16 condition one week before the evaluation date. Standardized answer choices were

provided, and each question was assigned a score ranging from 0 to 4. A normalized total score of 0 to 100 was calculated, and higher scores indicated that patients reported less pain. KOOS-pain correlates with the body pain subscale of the short form-36 health survey ( $r=0.67$ ,  $p<0.01$ ) and has good internal consistency (Cronbach's  $\alpha=0.90$ ).<sup>30</sup>

## ***Confounders***

### *Gait speed and knee joint functions*

Based on previous studies that reported the relationship between IADL disability and gait speed,<sup>18, 23, 31</sup> usual gait speed (UGS) was measured using a 5-meter gait test.<sup>32</sup> To test knee joint function, isometric knee extension strength (IKES) was measured using a handheld dynamometer<sup>a, 33</sup> Knee extension and flexion range of motion (ROM) were measured using a goniometer.<sup>34</sup> The knee scheduled for surgery was defined as the affected side, and opposite side was defined as the unaffected side. IKES and knee ROM measurements were conducted on both knees.

### *Depressive symptoms*

Depressive symptoms were assessed using Japanese version of the fifteen-item geriatric depression scale (GDS-15)<sup>35</sup> as the prevalence of depressive symptoms in patients with knee OA is higher than in the general population,<sup>36</sup> and depressive symptoms have been reported as a factor affecting IADL disability in older adults.<sup>37</sup> GDS-15 consists of 15 questions. The participants answered with a “yes” or “no” response. The total score was calculated from 0 to 15, with higher scores indicating more depressive symptoms.

### *Statistical analysis*

The participants were divided into two groups according to their IADL status: those who answered “need help” or “unable” to perform on at least one item were allocated as the IADL disabled group, and those who answered “able” in all items were assigned as the IADL non-disabled group. All outcome measures and confounders were compared between the two groups. The chi-square test was used for categorical variables, and student’s *t*-test and Mann–Whitney *U* test were used for standard and nonstandard

distribution variables, respectively. In the IADL disabled group, the proportion of each item of IADL disability was shown.

To confirm the relationships between confounders and pain statuses, correlations between continuous variables ( $p$ -values  $<0.05$ ), while comparing the two groups for the pain status, were calculated using Pearson's correlation coefficient and Spearman's rank correlation. Regarding sex differences, the values of pain status between men and women were compared.

The association of psychological factors related to pain with IADL disability was analyzed using binary logistic regression models. Previous reports have shown that age, sex,<sup>38</sup> depressive symptoms<sup>37</sup> and gait speed<sup>18, 23, 33</sup> were factors related to IADL disability in older adults. Three logistic regression models with dependent variable as IADL status (disabled= 1 or not= 0) were deployed hierarchically. The first model included pain status (e.g., KOOS-pain, PCS-6, PSEQ-4), age, and sex (men=1) as independent variables (Model 1). The second model added GDS-15 to Model 1 (Model

2). The final model included Model 2 with UGS and other confounders that had  $p$ -values  $<0.05$  in the two groups comparison (Model 3). All analyses were performed using R version 4.0.3. <sup>b</sup> for all tests, a  $p$ -value  $<0.05$ , was considered statistically significant.

To create a sample size in a logistic regression analysis, the number of cases ( $N$ ) =  $10 k/p$  are needed, where  $k$  is number of independent variables as covariates and  $p$  is a defined ratio of responders to non-responders at the follow-up points.<sup>39</sup> To avoid overfitting and comply with the recommendations given by Vittinghoff & McCulloch,<sup>40</sup> we assumed to arrive at nine factors out of all variables in measurements and demographics. In a previous study involving older adults with joint pain ( $n=407$ ), 60.9% of participants had IADL disability.<sup>23</sup> Assuming the ratio  $p$  of disabled to non-disabled was 1:1.5, the minimum sample size in this study was calculated as  $10 \times 9/0.6 = 150$ .



## Results

All participants completed all assessments, and all confounders were collected from their medical records. Of all participants, 88 (49.1%) had IADL disabilities. Sixty-one (69.3%) showed disability in shopping, and 47 (53.4%) showed disability in using transportation. No participant showed disability in taking medication and using a telephone (Table 1).

The IADL non-disabled group was significantly younger ( $p=0.001$ ) and had a greater number of men ( $p=0.009$ ) than the IADL disabled group. The IADL non-disabled group showed significantly higher values of UGS ( $1.02 \pm 0.27$  [mean  $\pm$  SD] vs.  $0.83 \pm 0.27$ ;  $p<0.001$ ), IKES on the affected side ( $1.23$  [0.96–1.59] (median [interquartile range]) vs.  $0.99$  [0.73–1.31];  $p<0.001$ ), IKES on the unaffected side ( $1.26$  [0.96–1.61] vs.  $0.94$  [0.75–1.30];  $p<0.001$ ), KOOS-pain ( $48.6 \pm 17.8$  vs.  $42.5 \pm 15.1$ ;  $p=0.01$ ) and PSEQ-4 ( $15.0$  [12.0–18.5] vs.  $13.0$  [11.0–15.0];  $p<0.001$ ). Conversely, the

IADL non-disabled group showed significantly lower values of PCS-6 (14.0 [7.5–17.0] vs. 16.0 [12.0–19.0];  $p=0.003$ ) and GDS-15 (3.0 [1.0–6.0] vs. 4.0 [2.0–7.3];  $p<0.001$ ) (Table 2).

The results of Pearson’s correlation coefficient and Spearman’s rank correlation coefficients are presented in Table 3. PCS-6 significantly correlated with UGS ( $r=-0.26$ ), IKES on the affected side ( $r=-0.17$ ), and GDS-15 ( $r=0.36$ ). PEQ-4 significantly correlated with UGS ( $r=0.20$ ), IKES on the affected side ( $r=0.27$ ), and GDS-15 ( $r=-0.42$ ). KOOS-pain significantly correlated with UGS ( $r=0.37$ ), IKES on the affected side ( $r=0.23$ ), IKES on the unaffected side ( $r=0.21$ ) and GDS-15 ( $r=-0.19$ ).

In the comparison of pain status between men and women, women showed significantly lower values of KOOS-pain ( $44.1 \pm 15.9$  vs.  $51.0 \pm 9.0$ ;  $p=0.02$ ) and higher values of PCS-6 (15.0 [11.0–19.0] vs. 13.5 [8.5–16.0];  $p=0.03$ ). The values of PSEQ-4 (13.0 [12.0–17.0] vs. 14.5 [11.3–19.5];  $p=0.24$ ) were not significantly different.

1  
2 In binary logistic regression analysis with IADL disability status as a  
3 dependent variable, PCS-6 (odds ratio [OR]=1.07, 95% confidence interval [CI] =1.00–  
4 1.14,  $p=0.004$ ), PSEQ-4 (OR=0.88, 95%CI=0.81–0.95,  $p=0.002$ ), age (OR=1.12,  
5 95%CI=1.05–1.12,  $p=0.01$ ) and sex (OR=0.33, 95%CI=0.14–0.79,  $p=0.002$ ) were  
6 significant independent variables in Model 1. In Model 2, PSEQ-4 (OR=0.90,  
7 95%CI=0.82–0.98,  $p=0.01$ ), age (OR=1.12, 95%CI=1.04–1.19,  $p=0.001$ ) and sex  
8 (OR=0.33, 95%CI=0.14–0.79,  $p=0.002$ ) were significantly independent variables. IKES  
9 on both sides showed significant differences between the two groups, and the effect size  
10 of IKES on the unaffected side was greater than that on the affected side. Therefore,  
11 only IKES on the unaffected side was included in the final model to avoid  
12 multicollinearity. In the final model, PSEQ-4 (OR=0.90, 95%CI=0.82–0.99,  $p=0.02$ ),  
13 UGS (OR=0.13, 95%CI=0.02–0.72,  $p=0.02$ ) and sex (OR=0.38, 95%CI=0.15–0.96,  
14  $p=0.04$ ) were significantly independent variables (Table 4).

15

16

## Discussion

The present study aimed to investigate the association between psychological factors related to pain and IADL disability in older adults with knee OA. The values of PCS-6 and PSEQ-4 were significantly different between the IADL non-disabled and IADL disabled groups. However, in the logistic regression analysis adjusted for covariates, PSEQ-4 was the only significant psychological factor related to pain associated with IADL disability.

In the final logistic regression model, sex and UGS were significantly independent variables. Alexandre et al. have shown that sex is a factor related to IADL disability in older adults.<sup>38</sup> Our results supported this finding. In particular, a reduction in gait speed has been reported as a strong factor related to IADL disability in older adults.<sup>23,33,41</sup> The result in this study is consistent with our previous study that showed gait speed is a discriminatory factor for IADL disability in older adults with knee OA.<sup>18</sup>

In this study, 49.1% of all participants had IADL disability. This proportion was lower than that in a previous study involving older adults with joint pain.<sup>23</sup> In our study population, main items pertaining to IADL disability were outdoor activities such as shopping (68.6%) and using transportation (50.6%) that required gait speed. Furthermore, because the effect size of UGS was the greatest of all measurements when compared between the two groups, it could be a crucial factor associated with IADL disability in older adults with knee OA.

Regarding pain status, a previous report involving patients with low back pain reported that the minimal importance change of PSEQ-4 was 1.5 points.<sup>42</sup> In our study results, the median difference in PSEQ-4 between the two groups was 2.0 points. In addition, the correlation between PSEQ-4 and UGS was weak, and PSEQ-4 was not significantly different for men and women. Therefore, these findings indicated that PSEQ-4 was hardly affected by demographics and motor functions and that it had a specific relationship with IADL disability in older adults with knee OA.

1           With respect to the relationship between pain self-efficacy and disability, two  
2   cross-sectional studies showed that self-efficacy related to pain was a factor related to  
3   disability in patients with chronic low back pain.<sup>43,44</sup> To our knowledge, however, few  
4   studies have assessed the relationship between disability and self-efficacy using a pain  
5   self-efficacy questionnaire in patients with knee OA. Some cross-sectional studies have  
6   shown that self-efficacy, which partially includes pain elements, is a factor related to  
7   disability in patients with knee OA.<sup>11,12</sup> A cohort study in older adults with knee pain  
8   reported that self-efficacy is a predictor of self-reported disability.<sup>10</sup> With respect to the  
9   relationship between IADL disability and self-efficacy, a previous cross-sectional study  
10   in older adults with chronic joint pain showed that self-efficacy is associated with IADL  
11   disability in logistic regression analysis that included demographics and pain intensity  
12   as covariates.<sup>24</sup> The results of the above studies are consistent with those of our study.  
13   Self-efficacy describes the confidence that a person has in one's ability to achieve a  
14   desired outcome.<sup>45</sup> In patients with knee OA, those with high self-efficacy for  
15   controlling arthritis pain have been found to have higher pain thresholds than those with  
16   low self-efficacy.<sup>46</sup> Therefore, older adults with knee OA who had high self-efficacy

might have the tendency not to voluntarily inhibit activities included in IADL even if they had knee pain. Consequently, we considered that PSEQ-4 was associated with IADL disability, even after adjusting for other covariates.

### ***Study limitations***

This study had several limitations. First, since this was a cross-sectional study, it was difficult to determine causal relationships between factors and IADL disability incidence. Second, because this study included patients with knee OA scheduled for TKA or UKA, treatment situations were different from general older adults with knee OA. Therefore, it might have been difficult to adapt the results to older adults with early-stage knee OA or low pain status. In particular, awaiting surgery could affect pain intensity and psychological factors related to the pain. Nonetheless, the average KOOS-pain score in this study population was not inferior to those in other studies.<sup>47</sup> The median PCS-6 and PSEQ-4 scores were also not inferior to those in previous studies in patients with chronic pain.<sup>27,28</sup> Third, because IADL disability was treated with categorical variables as the dependent variable in our logistic regression analyses, we

could not identify the impact of each factor on IADL disability. However, when comparing the two groups, the effect sizes of the variables that were significantly related to IADL disability in logistic regression models were roughly the same.

## Conclusion

In psychological factors related to pain, self-efficacy assessed using the PSEQ-4 was found to be associated with IADL disability even after adjusting for covariates. Sex and gait speed were also factors associated with IADL disability in older adults with knee OA. Our study showed the importance of assessing self-efficacy related to pain using the PSEQ-4 to determine the presence of IADL disability in older adults with knee OA. Future studies are necessary to elucidate the mechanism by which self-efficacy is related to IADL disability in older adults with knee OA. Furthermore, longitudinal



1 studies are needed to identify predictors of the development of IADL disability in older  
2 adults with knee OA.

3

4

5 **Suppliers**

6

7

8 a:  $\mu$ -tus F-1, Anima Corporation, 3-65-1, Shimoishihara, Chofu, Tokyo, 182-0034,

9 Japan

10 b: R version 4.0.3, R Foundation for Statistical Computing, Welthandelsplatz 1, 1020

11 Vienna, Austria

## References

1. Bijlsma JW, Berenbaum F, Lafeber FP. Osteoarthritis: an update with relevance for clinical practice. *Lancet* 2011;377(9783):2115-26.
2. Global, regional, and national incidence, prevalence, and years lived with disability for 310 diseases and injuries, 1990-2015: a systematic analysis for the Global Burden of Disease Study 2015. *Lancet* 2016;388(10053):1545-602.
3. Lawton MP, Brody EM. Assessment of older people: self-maintaining and instrumental activities of daily living. *Gerontologist* 1969;9(3):179-86.
4. Fried LP, Kronmal RA, Newman AB, Bild DE, Mittelmark MB, Polak JF et al. Risk factors for 5-year mortality in older adults: the Cardiovascular Health Study. *JAMA* 1998;279(8):585-92.
5. Scott WK, Macera CA, Cornman CB, Sharpe PA. Functional health status as a predictor of mortality in men and women over 65. *J Clin Epidemiol* 1997;50(3):291-6.

- 28 6. Rajan KB, Hebert LE, Scherr PA, Mendes de Leon CF, Evans DA. Disability in  
29 basic and instrumental activities of daily living is associated with faster rate of  
30 decline in cognitive function of older adults. J Gerontol A Biol Sci Med Sci  
31 2013;68(5):624-30.
- 32 7. Pereira D, Peleteiro B, Araújo J, Branco J, Santos RA, Ramos E. The effect of  
33 osteoarthritis definition on prevalence and incidence estimates: a systematic review.  
34 Osteoarthritis Cartilage 2011;19(11):1270-85.
- 35 8. van Dijk GM, Veenhof C, Lankhorst GJ, Dekker J. Limitations in activities in  
36 patients with osteoarthritis of the hip or knee: the relationship with body functions,  
37 comorbidity and cognitive functioning. Disabil Rehabil 2009;31(20):1685-91.
- 38 9. Zambon S, Siviero P, Denking M, Limongi F, Victoria Castell M, van der Pas S et  
39 al. Role of osteoarthritis, comorbidity, and pain in determining functional  
40 limitations in older populations: European project on osteoarthritis. Arthritis Care  
41 Res (Hoboken) 2016;68(6):801-10.

- 42 10. Rejeski WJ, Miller ME, Foy C, Messier S, Rapp S. Self-efficacy and the  
43 progression of functional limitations and self-reported disability in older adults with  
44 knee pain. *J Gerontol B Psychol Sci Soc Sci* 2001;56(5):S261-5.
- 45 11. Maly MR, Costigan PA, Olney SJ. Determinants of self-report outcome measures in  
46 people with knee osteoarthritis. *Arch Phys Med Rehabil* 2006;87(1):96-104.
- 47 12. Creamer P, Lethbridge-Cejku M, Hochberg MC. Factors associated with functional  
48 impairment in symptomatic knee osteoarthritis. *Rheumatology (Oxford)*  
49 2000;39(5):490-6.
- 50 13. Dixon KE, Keefe FJ, Scipio CD, Perri LM, Abernethy AP. Psychological  
51 interventions for arthritis pain management in adults: a meta-analysis. *Health*  
52 *Psychol* 2007;26(3):241-50.
- 53 14. Bennell KL, Ahamed Y, Jull G, Bryant C, Hunt MA, Forbes AB et al. Physical  
54 therapist-delivered pain coping skills training and exercise for knee osteoarthritis:  
55 randomized controlled trial. *Arthritis Care Res (Hoboken)* 2016;68(5):590-602.

- 56 15. Barberger-Gateau P, Rainville C, Letenneur L, Dartigues JF. A hierarchical model  
57 of domains of disablement in the elderly: a longitudinal approach. *Disabil Rehabil*  
58 2000;22(7):308-17.
- 59 16. Edjolo A, Proust-Lima C, Delva F, Dartigues JF, Pérès K. Natural history of  
60 dependency in the elderly: A 24-year population-based study using a longitudinal  
61 item response theory model. *Am J Epidemiol* 2016;183(4):277-85.
- 62 17. George LK, Ruiz D, Sloan FA. The effects of total knee arthroplasty on physical  
63 functioning in the older population. *Arthritis Rheum* 2008;58(10):3166-71.
- 64 18. Nanjo K, Ikeda T, Nagashio N, Masuda T, Sakai T, Okawa A et al. Gait speed and  
65 pain status as discriminatory factors for instrumental activities of daily living  
66 disability in older adults with knee osteoarthritis. *Geriatr. Gerontol. Int* 2021;1–6.  
67 <https://doi.org/10.1111/ggi.14229>
- 68 19. Altman R, Asch E, Bloch D, Bole G, Borenstein D, Brandt K et al. Development of  
69 criteria for the classification and reporting of osteoarthritis. Classification of  
70 osteoarthritis of the knee. Diagnostic and therapeutic criteria committee of the  
71 American Rheumatism Association. *Arthritis Rheum* 1986;29(8):1039-49.

- 72 20. von Elm E, Altman DG, Egger M, Pocock SJ, Gøtzsche PC, Vandenbroucke JP.  
73 The Strengthening the Reporting of Observational Studies in Epidemiology  
74 (STROBE) statement: guidelines for reporting observational studies. J Clin  
75 Epidemiol. 2008;61(4):344-9.
- 76 21. Charlson ME, Pompei P, Ales KL, MacKenzie CR. A new method of classifying  
77 prognostic comorbidity in longitudinal studies: development and validation. J  
78 Chronic Dis 1987;40(5):373-83.
- 79 22. Kellgren JH, Lawrence JS. Radiological assessment of osteoarthritis. Ann Rheum  
80 Dis 1957;16(4):494-502.
- 81 23. Lee MC, Hsu CC, Tsai YF, Chen CY, Lin CC, Wang CY. Criterion-referenced  
82 values of grip strength and usual gait speed using instrumental activities of daily  
83 living disability as the criterion. J Geriatr Phys Ther 2018;41(1):14-9.
- 84 24. Hermesen LA, Leone SS, Smalbrugge M, Dekker J, van der Horst HE. Frequency,  
85 severity and determinants of functional limitations in older adults with joint pain  
86 and comorbidity: results of a cross-sectional study. Arch Gerontol Geriatr  
87 2014;59(1):98-106.

- 88 25. Nishigami T, Mibu A, Tanaka K, Yamashita Y, Watanabe A, Tanabe A.  
89 Psychometric properties of the Japanese version of short forms of the pain  
90 catastrophizing scale in participants with musculoskeletal pain: A cross-sectional  
91 study. J Orthop Sci 2017;22(2):351-6.
- 92 26. Sullivan MJ, Bishop SR, Pivik J. The pain catastrophizing scale: development and  
93 validation. Psychol Assess 1995;7(4): 524-532.
- 94 27. McWilliams LA, Kowal J, Wilson KG. Development and evaluation of short forms  
95 of the pain catastrophizing scale and the pain self-efficacy questionnaire. Eur J Pain  
96 2015;19(9):1342-9.
- 97 28. Adachi T, Enomoto K, Yamada K, Inoue D, Nakanishi M, Takahashi N, et al.  
98 Evaluating the psychometric properties of two-item and four-item short forms of  
99 the Japanese pain self-efficacy questionnaire: a cross-sectional study. J Anesth  
100 2019;33(1):58-66.
- 101 29. Nicholas MK. The pain self-efficacy questionnaire: Taking pain into account. Eur J  
102 Pain 2007;11(2):153-63.

- 103 30. Nakamura N, Takeuchi R, Sawaguchi T, Ishikawa H, Saito T, Goldhahn S. Cross-  
104 cultural adaptation and validation of the Japanese knee injury and osteoarthritis  
105 outcome score (KOOS). J Orthop Sci 2011;16(5):516-23.
- 106 31. Zhang L, Guo L, Wu H, Gong X, Lv J, Yang Y. Role of physical performance  
107 measures for identifying functional disability among Chinese older adults: Data  
108 from the China Health and Retirement Longitudinal Study. PLoS One  
109 2019;14(4):e0215693.
- 110 32. Shinkai S, Watanabe S, Kumagai S, Fujiwara Y, Amano H, Yoshida H et al.  
111 Walking speed as a good predictor for the onset of functional dependence in a  
112 Japanese rural community population. Age Ageing 2000;29(5):441-6.
- 113 33. Katoh M, Yamasaki H. Comparison of reliability of isometric leg muscle strength  
114 measurements made using a hand-held dynamometer with and without a restraining  
115 belt. J Phys. Ther. Sci. 2009;21(1):37-42.
- 116 34. Norkin CC, White DJ. Measurement of joint motion: a guide to goniometry. 2nd ed.  
117 Philadelphia: F.A. Davis; 1995.



- 118 35. Sugishita K, Sugishita M, Hemmi I, Asada T, Tanigawa T. A validity and  
119 reliability study of the Japanese version of the geriatric depression scale 15 (GDS-  
120 15-J). Clin Gerontol 2017;40(4):233-40.
- 121 36. Stubbs B, Aluko Y, Myint PK, Smith TO. Prevalence of depressive symptoms and  
122 anxiety in osteoarthritis: a systematic review and meta-analysis. Age  
123 Ageing. 2016;45(2):228–235.
- 124 37. Steffens DC, Hays JC, Krishnan KRR. 1999. Disability in geriatric depression. Am  
125 J Geriatr Psychiatry. 1999;7:34-40.
- 126 38. Alexandre TaS, Corona LP, Nunes DP, Santos JL, Duarte YA, Lebrão ML.  
127 Disability in instrumental activities of daily living among older adults: gender  
128 differences. Rev Saude Publica 2014;48(3):379-89.
- 129 39. Peduzzi P, Concato J, Kemper E, Holford TR, Feinstein AR. A simulation study of  
130 the number of events per variable in logistic regression analysis. J Clin Epidemiol.  
131 1996;49(12):1373–9.

- 132 40. Vittinghoff E, McCulloch CE. Relaxing the rule of ten events per variable in  
133 logistic and cox regression. *Am J Epidemiol.* 2007;165(6):710–8. [https://doi.](https://doi.org/10.1093/aje/kwk052)  
134 [org/10.1093/aje/kwk052](https://doi.org/10.1093/aje/kwk052).
- 135 41. Donoghue OA, Savva GM, Cronin H, Kenny RA, Horgan NF. Using timed up and  
136 go and usual gait speed to predict incident disability in daily activities among  
137 community-dwelling adults aged 65 and older. *Arch Phys Med Rehabil*  
138 2014;95(10):1954-61.
- 139 42. Chiarotto A, Vanti C, Cedraschi C, Ferrari S, de Lima E, Sa Resende F, Ostelo RW  
140 et al. Responsiveness and minimal important change of the pain self-efficacy  
141 questionnaire and short forms in patients with chronic low back pain. *J Pain*  
142 2016;17(6):707-18.
- 143 43. Costa LaC, Maher CG, McAuley JH, Hancock MJ, Smeets RJ. Self-efficacy is  
144 more important than fear of movement in mediating the relationship between pain  
145 and disability in chronic low back pain. *Eur J Pain* 2011;15(2):213-9.
- 146 44. Ayre M, Tyson GA. The role of self-efficacy and fear-avoidance beliefs in the  
147 prediction of disability. *Aust Psychol* 2001;36(3):250-253.

- 148 45. Bandura A. Self-efficacy: toward a unifying theory of behavioral change. Psychol  
149 Rev 1977;84(2):191-215.
- 150 46. Keefe FJ, Lefebvre JC, Maixner W, Salley AN, Caldwell DS. Self-efficacy for  
151 arthritis pain: relationship to perception of thermal laboratory pain stimuli. Arthritis  
152 Care Res 1997;10(3):177-84.
- 153 47. Collins NJ, Prinsen CA, Christensen R, Bartels EM, Terwee CB, Roos EM. Knee  
154 injury and osteoarthritis outcome score (KOOS): systematic review and meta-  
155 analysis of measurement properties. Osteoarthritis Cartilage 2016;24(8):1317-29.
- 156 48. Field A. Discovering statistics using IBM SPSS Statistics. 4th ed. London: Sage  
157 Publications Ltd; 2012.

Table 1. Content of IADL disability in IADL disabled group (n=88)

| item                 |           |
|----------------------|-----------|
| Preparing food       | 33 (37.5) |
| Shopping             | 61 (69.3) |
| Housekeeping         | 40 (45.5) |
| Doing laundry        | 6 (6.8)   |
| Taking medication    | 0 (0)     |
| Using transportation | 47 (53.4) |
| Using a telephone    | 0 (0)     |
| Handling finances    | 15 (17.0) |

Number (%) was shown.

IADL: Instrumental activity of daily living

Table 2. Baseline characteristics of the study population and comparison between IADL non-disabled and disabled groups

| variable                                             | ALL (n= 179)     | IADL non-disabled<br>(n=91) | IADL disabled<br>(n=88) | p-value | effect size |
|------------------------------------------------------|------------------|-----------------------------|-------------------------|---------|-------------|
| Women; number (%)                                    | 141 (78.8)       | 64 (70.6)                   | 77 (87.5)               | 0.009   | 0.2         |
| Age; mean±SD                                         | 76.5 ± 5.4       | 75.2 ± 5.2                  | 77.8 ± 5.2              | 0.001   | 0.24        |
| Body mass Index(kg/m <sup>2</sup> );<br>median (IQR) | 23.1 (21.1–26.2) | 22.9 (21.4–26.1)            | 23.1 (21.4–26.1)        | 0.74    | 0.02        |
| Family status (living alone);<br>number (%)          | 36 (20.1)        | 22 (24.2)                   | 14 (15.9)               | 0.23    | 0.09        |
| CCI; median (IQR)                                    | 0 (0–1.0)        | 0 (0–1.0)                   | 0 (0–1.0)               | 0.63    | 0.04        |
| KL score on affected side                            |                  |                             |                         |         |             |
| II; number (%)                                       | 19 (10.6)        | 9 (9.9)                     | 10 (11.4)               | 0.44    | 0.1         |
| III; number (%)                                      | 101 (56.4)       | 48 (52.7)                   | 53 (60.2)               |         |             |
| IV; number (%)                                       | 59 (33.0)        | 34 (37.4)                   | 25 (28.4)               |         |             |
| KL score on unaffected side                          |                  |                             |                         |         |             |
| II; number (%)                                       | 62 (34.6)        | 33 (36.3)                   | 29 (33.0)               | 0.5     | 0.09        |
| III; number (%)                                      | 82 (45.8)        | 38 (41.8)                   | 44 (50.0)               |         |             |
| IV; number (%)                                       | 35 (19.6)        | 20 (22.0)                   | 15 (17.0)               |         |             |
| Pain status                                          |                  |                             |                         |         |             |
| KOOS-pain; mean±SD                                   | 45.6 ± 16.8      | 48.6 ± 17.8                 | 42.5 ± 15.1             | 0.01    | 0.18        |
| PCS-6; median (IQR)                                  | 15.0 (10.0-18.0) | 14.0 (7.5-17.0)             | 16.0 (12.0-19.0)        | 0.003   | 0.23        |
| PSEQ-4; median (IQR)                                 | 14.0 (12.0-17.0) | 15.0 (12.0-18.5)            | 13.0 (11.0-15.0)        | <0.001  | 0.29        |

|                                     |                 |                  |                  |                  |        |      |
|-------------------------------------|-----------------|------------------|------------------|------------------|--------|------|
| UGS (m/sec); mean±SD                |                 | 0.93 ± 0.27      | 1.02 ± 0.27      | 0.83 ± 0.27      | <0.001 | 0.37 |
| IKES (Nm/kg); median (IQR)          | affected side   | 1.09 (0.81–1.43) | 1.23 (0.96–1.59) | 0.99 (0.73–1.31) | <0.001 | 0.27 |
|                                     | unaffected side | 1.10 (0.78–1.47) | 1.26 (0.96–1.61) | 0.94 (0.75–1.30) | <0.001 | 0.29 |
| Knee flexion ROM(°); median (IQR)   | affected side   | 130 (115–135)    | 130 (115–135)    | 130 (115–140)    | 0.86   | 0.03 |
|                                     | unaffected side | 125 (120–140)    | 125 (120–137.5)  | 130 (115–140)    | 0.63   | 0.03 |
| Knee extension ROM(°); median (IQR) | affected side   | -5 (-10 to 0)    | -5 (-10 to 0)    | -5 (-10 to 0)    | 0.51   | 0.05 |
|                                     | unaffected side | -5 (-10 to 0)    | -5 (-5 to 0)     | -5 (-10 to 0)    | 0.25   | 0.07 |
| GDS-15; median (IQR)                |                 | 3.0 (1.5–6.0)    | 3.0 (1.0–6.0)    | 4.0 (2.0-7.3)    | <0.001 | 0.25 |

Effect size was estimated using  $r$  for continuous variables ( $r = \sqrt{t^2 / (t^2 + df)}$ , for standard distribution variables;  $r = z / \sqrt{N}$ , for nonstandard distribution variables) and Cramér's  $V$  for categorical variables.<sup>48</sup>

CCI, Charlson comorbidity index; GDS-15, fifteen-item geriatric depression scale; IADL, instrumental activities of daily living; IKES, isometric knee extension strength; KL-score, Kellgen-Lawllence score; KOOS-pain, pain subscale of the knee injury and osteoarthritis outcome score; OA, osteoarthritis; PCS-6, six-item short form of the pain catastrophizing scale; PSEQ-4, four-item short form of the pain self-efficacy questionnaire; ROM, range of motion; UGS, usual gait speed

Table 3. Correlation between variables of pain status and covariates

| variable                | PCS-6              | PSEQ-4             | KOOS-pain          |
|-------------------------|--------------------|--------------------|--------------------|
| Age                     | 0.07               | -0.04              | -0.09              |
| UGS                     | -0.26 <sup>†</sup> | 0.20 <sup>†</sup>  | 0.37 <sup>‡</sup>  |
| IKES on affected side   | -0.17*             | 0.15               | 0.23 <sup>†</sup>  |
| IKES on unaffected side | -0.10              | 0.27 <sup>‡</sup>  | 0.21 <sup>†</sup>  |
| GDS-15                  | 0.36 <sup>‡</sup>  | -0.42 <sup>‡</sup> | -0.19 <sup>†</sup> |

\*:  $p < 0.05$ , <sup>†</sup>:  $p < 0.01$ , <sup>‡</sup>:  $p < 0.001$

Pearson's correlation coefficient and Spearman's rank correlation coefficients are presented.

GDS-15, fifteen-item geriatric depression scale; IKES, isometric knee extension strength; KOOS-pain, pain subscale of the knee injury and osteoarthritis outcome score; PCS-6, six-item short form of the pain catastrophizing scale; PSEQ-4, four-item short form of the pain self-efficacy questionnaire; UGS, usual gait speed

Table 4. logistic regression model with the dependent variable as IADL disable or not.

| Variable             | Model1   |                   |           | Model2            |           | Model3      |           |
|----------------------|----------|-------------------|-----------|-------------------|-----------|-------------|-----------|
|                      | Crude OR | Adjusted OR       | 95%CI     | Adjusted OR       | 95%CI     | Adjusted OR | 95%CI     |
| PCS-6                | 1.07     | 1.07*             | 1.00–1.14 | 1.06              | 0.99–1.13 | 1.06        | 0.94–1.19 |
| PSEQ-4               | 0.86     | 0.88 <sup>†</sup> | 0.81–0.95 | 0.90*             | 0.82–0.98 | 0.90*       | 0.82–0.99 |
| KOOS pain            | 0.98     | 1.00              | 0.98–1.03 | 1.00              | 0.98–1.03 | 1.01        | 0.99–1.04 |
| Age                  | 1.10     | 1.12 <sup>†</sup> | 1.05–1.19 | 1.12 <sup>†</sup> | 1.04–1.19 | 1.07        | 1.00–1.15 |
| Sex                  | 0.33     | 0.33*             | 0.14-0.79 | 0.33*             | 0.14-0.79 | 0.38*       | 0.15–0.96 |
| GDS-15               | 1.17     |                   |           | 1.08              | 0.96–1.21 | 1.06        | 0.94–1.19 |
| UGS                  | 0.05     |                   |           |                   |           | 0.13*       | 0.02–0.72 |
| IKES unaffected side | 0.35     |                   |           |                   |           | 0.73        | 0.32–1.64 |



Model1; Hosmer-Lemeshow test = 0.71, area under the curve (95% CI) = 0.77 (0.70–0.84)

Model2; Hosmer-Lemeshow test = 0.12, area under the curve (95% CI) = 0.77 (0.70–0.84)

Model3; Hosmer-Lemeshow test = 0.47, area under the curve (95% CI) = 0.80 (0.73–0.86)

∗:  $p < 0.05$ , †:  $p < 0.01$

CI, confidence interval; GDS-15, fifteen-item geriatric depression scale; IADL, instrumental activities of daily living; IKES, isometric knee extension strength; KOOS-pain, Pain subscale of the knee injury and osteoarthritis outcome score; OR, odds ratio; PCS-6, six-item short form of the pain catastrophizing scale; PSEQ-4, four-item short form of the pain self-efficacy questionnaire; ROM, range of motion; UGS, usual gait speed;
